# Supplementary material for: Transcriptome analyses reveal tau isoform-driven changes in transposable element and gene expression
Source: PubMed Central journal article supplement (PMC8480850; doi:10.1371/journal.pone.0251611), 2021-09-29
Supplement: pone.0251611.s001.pdf [file pone.0251611.s001.pdf]

# Cytoplasmic fraction

# Nuclear fraction

3R tau primary antibody

H3 primary antibody

GAPDH primary antibody

50 kDa

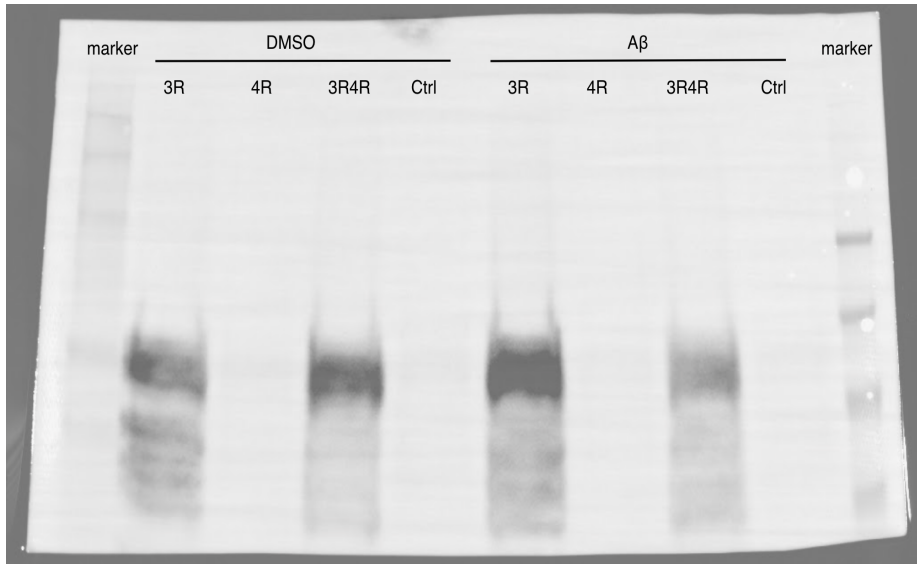

45 kDa

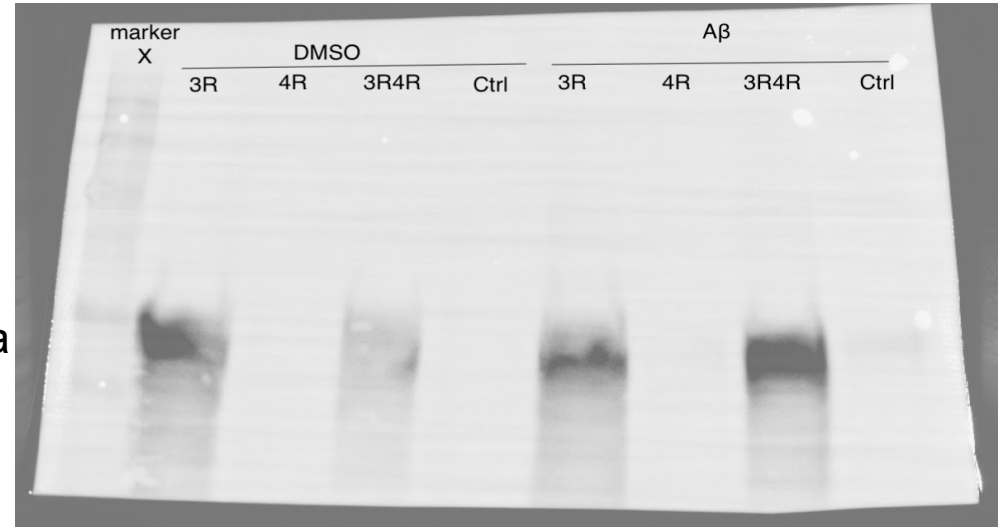

20 kDa

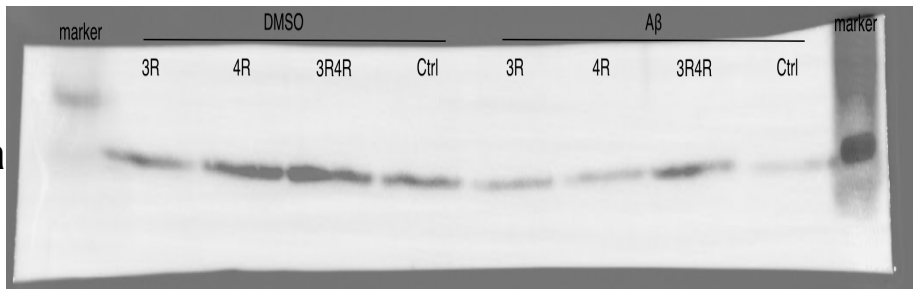

17 kDa

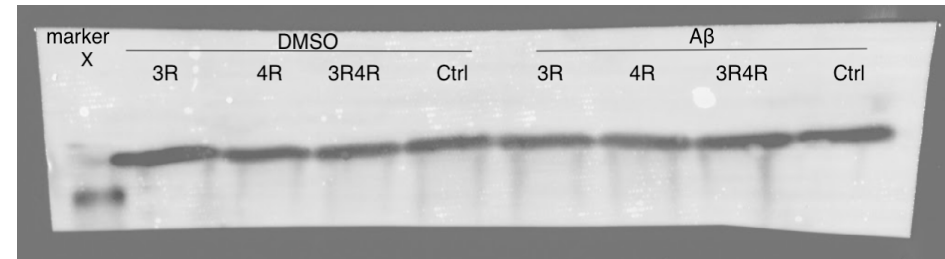

33 kDa

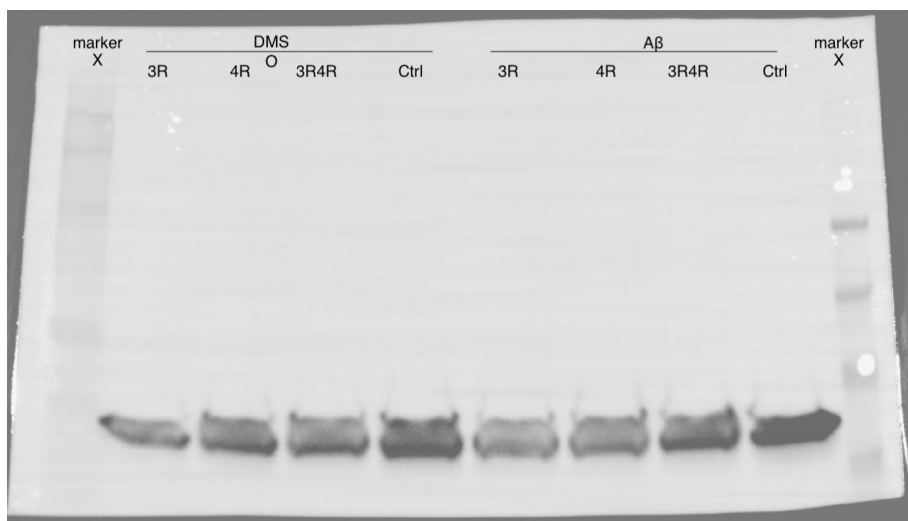

35 kDa

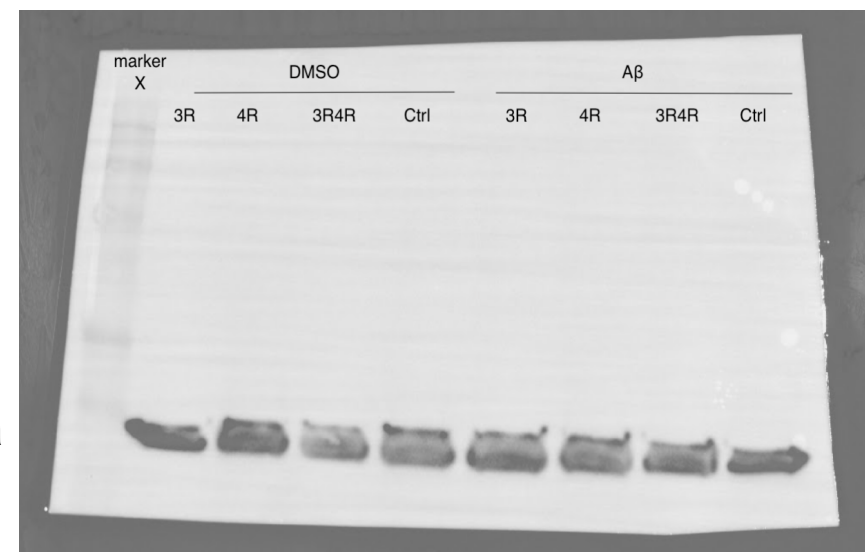

\* All blots shown on this page were used in Fig 1A; top left and top right images.

# Cytoplasmic fraction

# Nuclear fraction

4R tau primary antibody

H3 primary antibody

GAPDH primary antibody

50 kDa

50 kDa

20 kDa

17 kDa

33 kDa

35 kDa

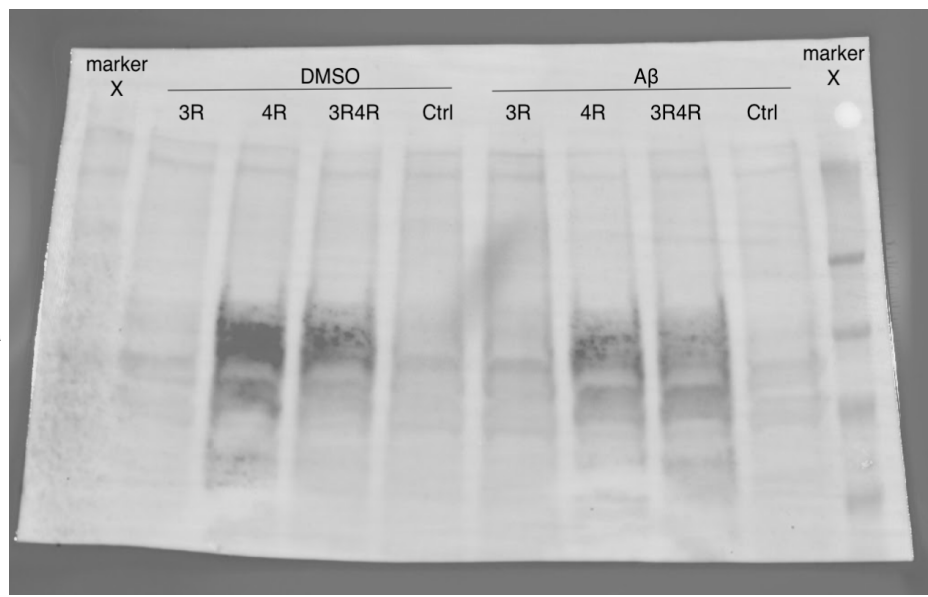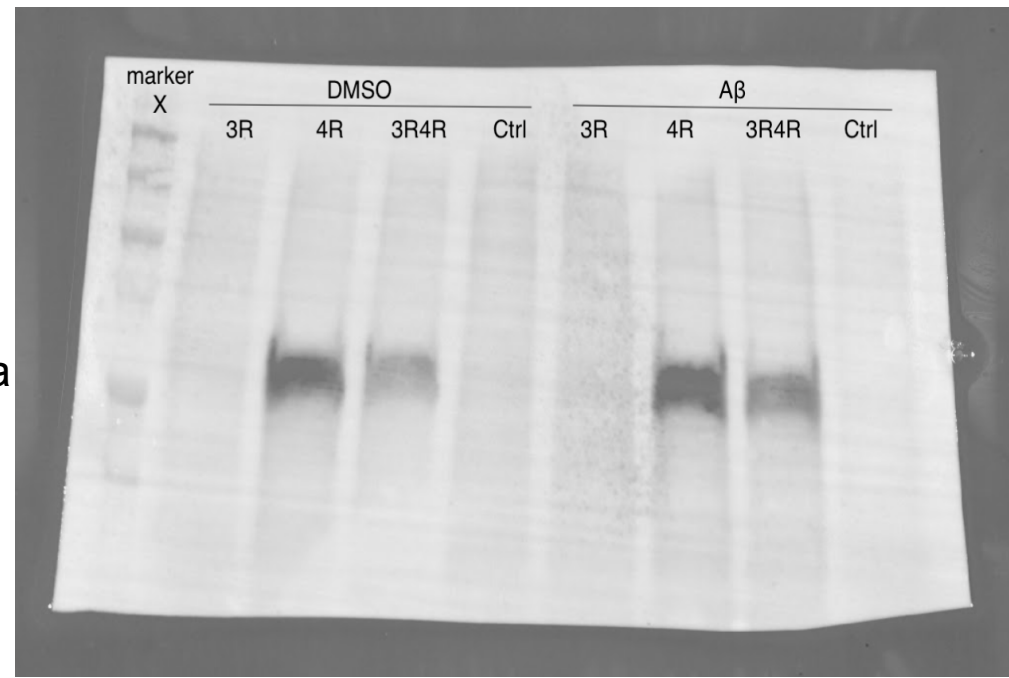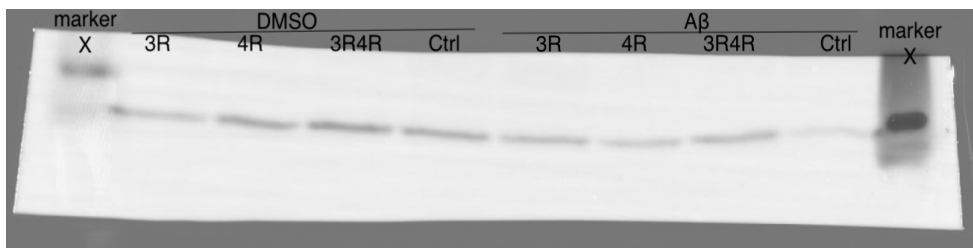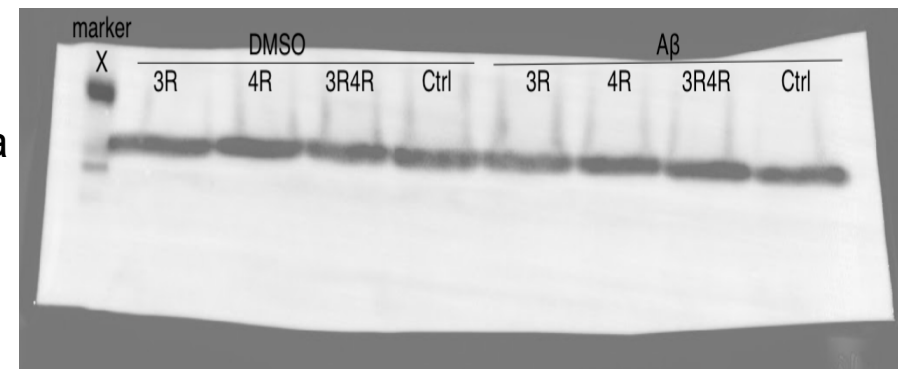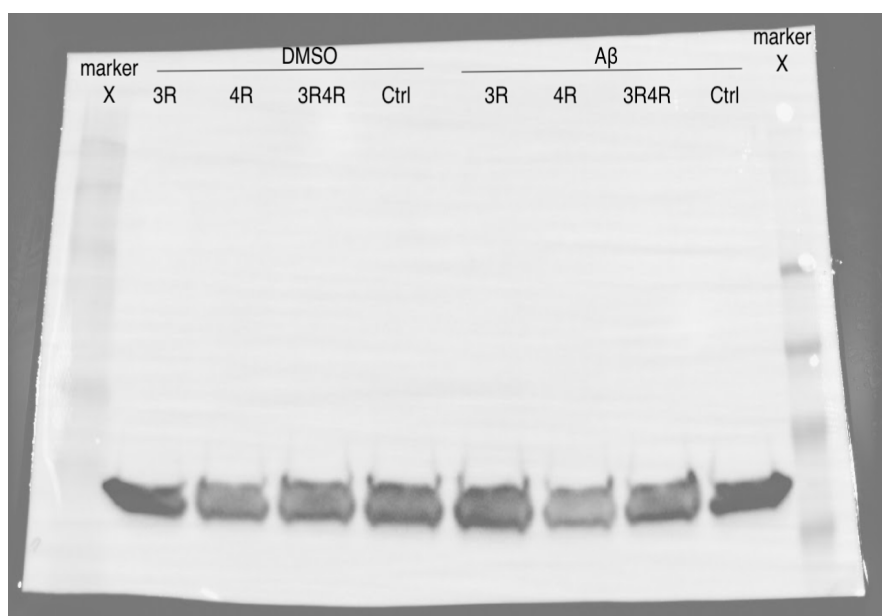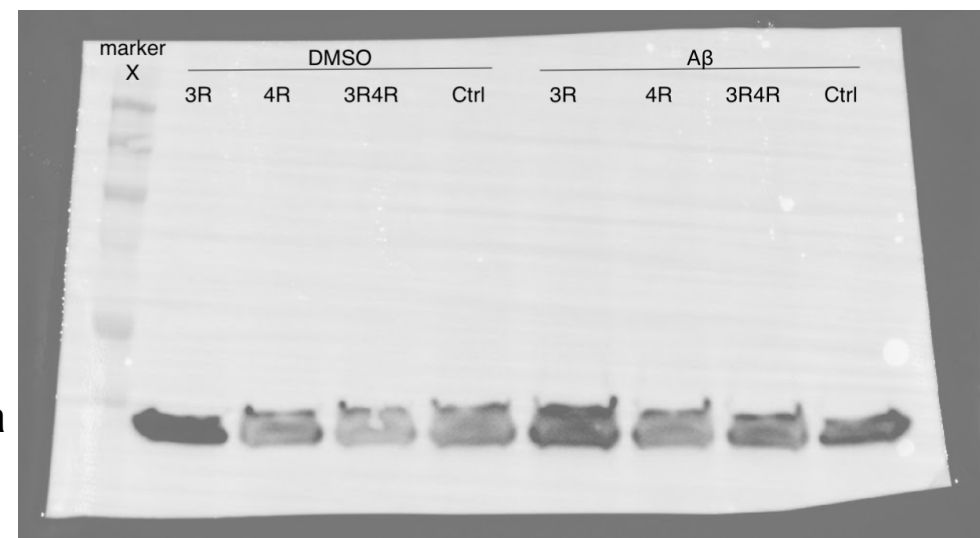

\* All blots shown on this page were used in Fig 1A; bottom left and bottom right images.
